# Supplementary material for: Unraveling the regulation of a polyhydroxy electrolyte additive for a reversible, dendrite-free zinc anode
Source: Royal Society of Chemistry journal article supplement (doi:10.1039/d2ta09875j), 2023-01-01
Supplement: d2ta09875j1.pdf [file d2ta09875j1.pdf]

Supporting Information

**Unraveling the Regulation of Polyhydroxy Electrolyte Additive for a Reversible,  
Dendrite-Free Zinc Anode**

Cong Wang<sup>a,+</sup>, Junming Hou<sup>b,+</sup>, Yaping Gan<sup>a</sup>, Lei Xie<sup>a</sup>, Yi He<sup>a,\*</sup>, Qiang Hu<sup>b,\*</sup>, Shude Liu<sup>c, d</sup>,  
Seong Chan Jun<sup>d,\*</sup>

<sup>a</sup> Ecology and Health Institute, Hangzhou Vocational and Technical College, Hangzhou  
310018, China

<sup>b</sup> School of Materials and Energy, University of Electronic Science and Technology of China,  
Chengdu 610054, China

<sup>c</sup> JST-ERATO Yamauchi Materials Space-Tectonics Project, National Institute for Materials  
Science, 1-1 Namiki, Tsukuba, Ibaraki, 305-0044 Japan

<sup>d</sup> School of Mechanical Engineering, Yonsei University, Seoul, 120-749 South Korea

[+] These authors contribute equally to this work

\*Corresponding Author. Email: [heyi24@hzvtc.edu.cn](mailto:heyi24@hzvtc.edu.cn) (Y. He), [huqiang@std.uestc.edu.cn](mailto:huqiang@std.uestc.edu.cn) (Q.  
Hu), [scj@yonsei.ac.kr](mailto:scj@yonsei.ac.kr) (S. C.Jun)

## Supplemental Experimental Details

### *Materials:*

Zn foil (~0.1 mm) and Pt were purchased from Haoxuan Metal Material Co., Ltd. ZnSO<sub>4</sub>·7H<sub>2</sub>O (>99.0%), sucrose (TS, >99.9%), Ag/AgCl electrode, ammonium persulfate (APS, >99.99%) and V<sub>2</sub>O<sub>5</sub> powder (>99.99%) were purchased from Sinopharm Chemical Reagent Co., Ltd. All other reagents were analytical grade and used directly without further purification. Deionized water was used to prepare all aqueous electrolytes.

### *Materials Characterization:*

The micromorphology of the samples was observed using scanning electron microscopy (SEM, FEI-Quanta 250, USA). The elemental analysis of the samples was characterized using a scanning electron microscope (FE-SEM, JSM-7500, Japan) equipped with corresponding energy-dispersive X-ray (EDX) elemental mapping. The crystal structure of the samples was characterized through the X-ray diffraction analysis (XRD, Smart Lab, Rigaku, Japan) with Cu-K $\alpha$  ( $\lambda$ = 1.540598 Å, Smart Lab) source (scan rate of 4° min<sup>-1</sup>) in the 2 $\theta$  range of 5°~85°. The analysis of the electrolytes was carried out by H magnetic resonance imaging (NMR spectroscopy (Bruker advance III) and Fourier transform infrared spectrum (FTIR, NICOLET iS50, USA).

### *Electrochemical Tests:*

Electrochemical characterization of symmetrical Zn//Zn cells with two different electrolytes was conducted using both transparent cells and 2032-type coin cells. Electrochemical impedance spectroscopy (EIS) of these cells was conducted on an electrochemical workstation (CHI660E, Shanghai, China) over the frequency range of 100 kHz to 1 Hz. The Zn//V<sub>2</sub>O<sub>5</sub> coin and pouch cells were galvanostatically charged/discharged in the voltage range of 0.2–1.5 V vs. Zn/Zn<sup>2+</sup> at different current densities on a Land CT5001A battery tester, and specific capacities were calculated based on the active mass of V<sub>2</sub>O<sub>5</sub> cathode. The mass of V<sub>2</sub>O<sub>5</sub> and Zn foil are approximately 1.5 mg and 100 mg, respectively. The width of Zn, V<sub>2</sub>O<sub>5</sub>, and separator are 14 mm, 14 mm, and 18 mm, respectively. In addition, the amount of Suc-containing electrolyte used is 90  $\mu$ L.

### ***Transparent Zn Cell and In Situ Dendrite Observation:***

A transparent Zn-Zn cell was designed to observe the Zn dendrite growth. Specifically, a transparent glass dish, two Zn ribbons (0.5 cm × 3 cm), and two plastic clamps form a pool for observing the Zn dendrites. The transparent glass dish is used to store the electrolyte. The Zn dendrites growth was in situ observed by an optical microscope equipped with a digital camera. Meanwhile, the transparent Zn cell was tested for Zn stripping/plating using an electrochemical workstation (CHI660E).

### ***Theoretical Calculations:***

The Vienna ab initio simulation package (VASP) was used to perform all the calculations.<sup>[1]</sup> The electronic exchange-correlation energy was implemented using the Perdew-Burke-Ernzerhof (PBE) functional within the generalized gradient approximation (GGA), and the projector augmented wave (PAW) method describing electron-ion interactions.<sup>[2]</sup> In geometry optimization settings, the atomic positions were optimized until all components of the forces on each atom were less than  $-0.05 \text{ eV/\AA}$  and the total energy converge was set to below  $10^{-5} \text{ eV}$ . The DFT-D3 correction was used to describe van der Waals interactions.<sup>[3]</sup> A cutoff energy of 400 eV and a Monkhorst-Pack k-point grid of  $2 \times 2 \times 1$  were used, respectively. A vacuum of  $15 \text{ \AA}$  was set to circumvent periodic interactions between the atoms.

The binding energy ( $E_b$ ) is defined as

$$E_b = E_{A+B} - (E_A + E_B)$$

where  $E_{A+B}$  is the total energy of a combined system of A and B,  $E_B + E_A$  is the sum of the total energies of A and B before the combination. A and B refer to Suc,  $\text{Zn}^{2+}$ ,  $\text{H}_2\text{O}$ , and Zn slab (002), respectively.

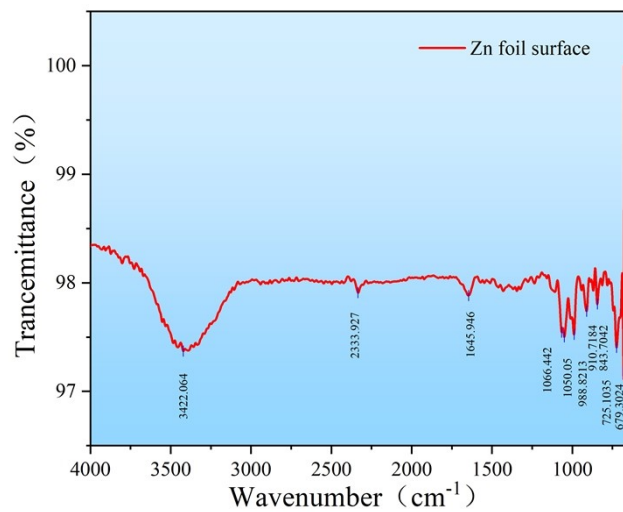

Fig. S1. FTIR spectrum of Zn foil soaked in 1 M ZnSO<sub>4</sub> with Suc after 1 day.

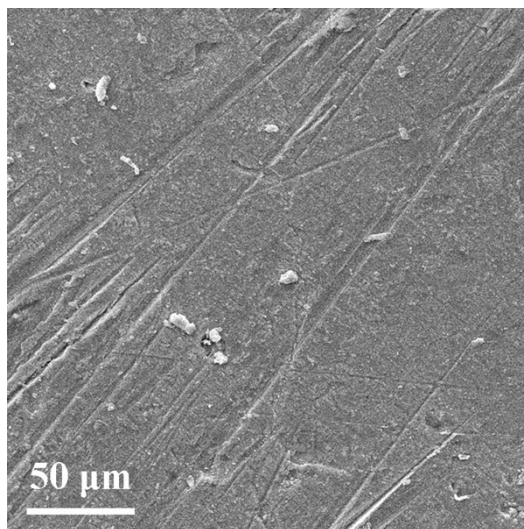

Fig. S2. SEM image of the pure Zn foil.

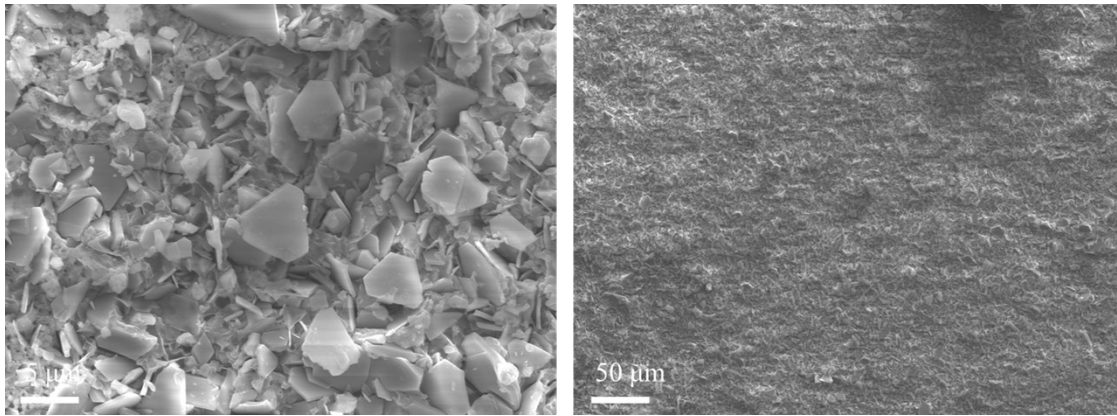

**Fig. S3.** SEM images at different magnifications for the Zn foil soaked in 1 M ZnSO<sub>4</sub> after 7 days.

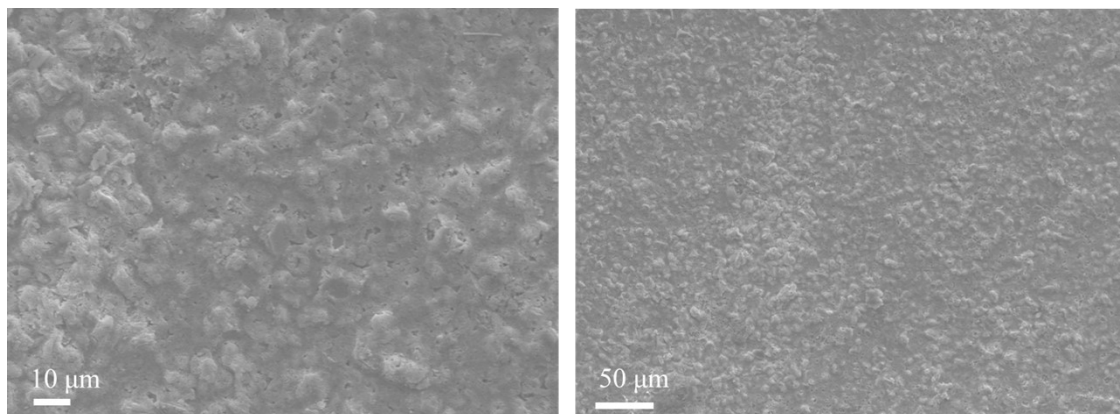

**Fig. S4.** SEM images at different magnifications for Zn foil soaked in 1 M ZnSO<sub>4</sub> with Suc after 7 days.

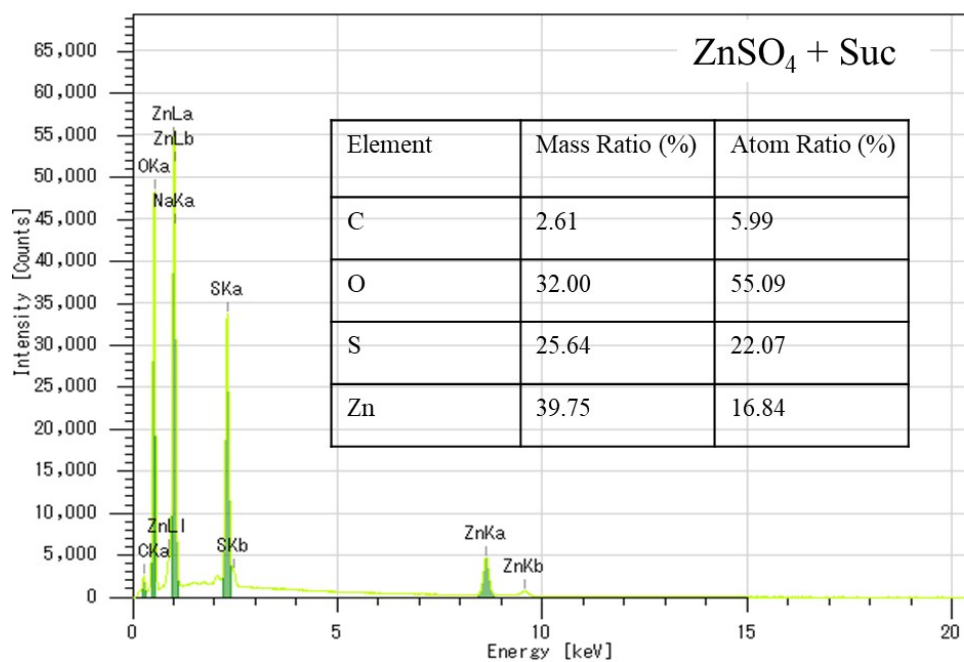

**Fig. S5.** EDS spectrum of Zn foil soaked in 1 M ZnSO<sub>4</sub> after 7 days.

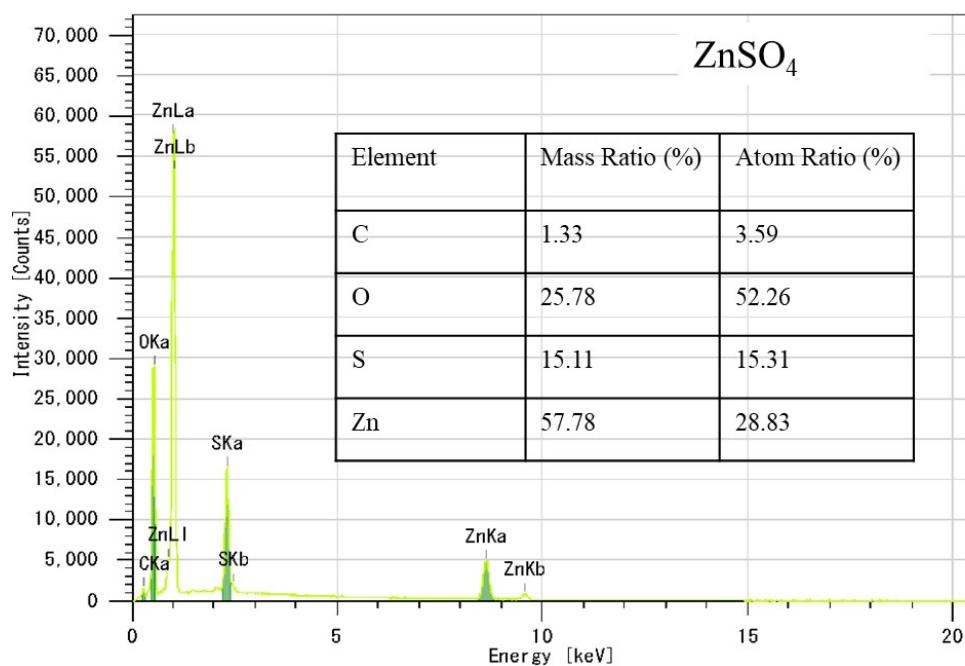

**Fig. S6.** EDS spectrum of Zn foil soaked in 1 M ZnSO<sub>4</sub> with Suc after 7 days.

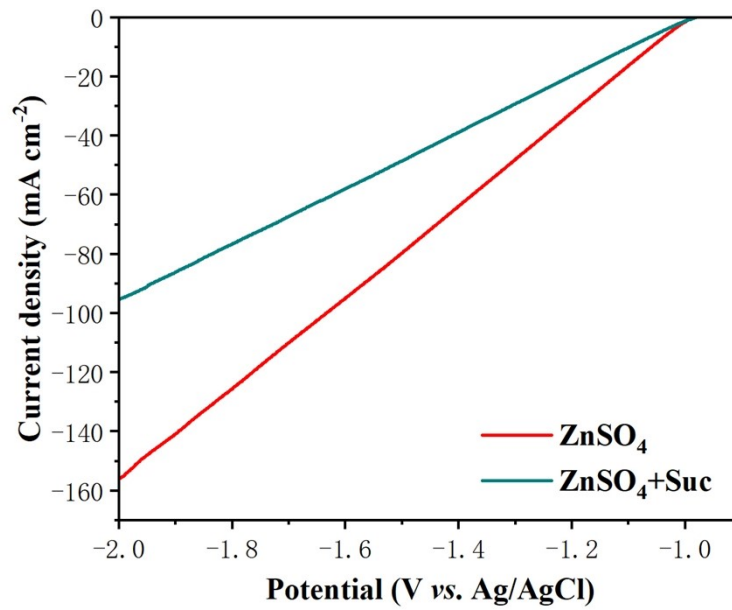

**Fig. S7.** Comparison of HER performance under ZnSO<sub>4</sub> and ZnSO<sub>4</sub> + Suc electrolyte systems.

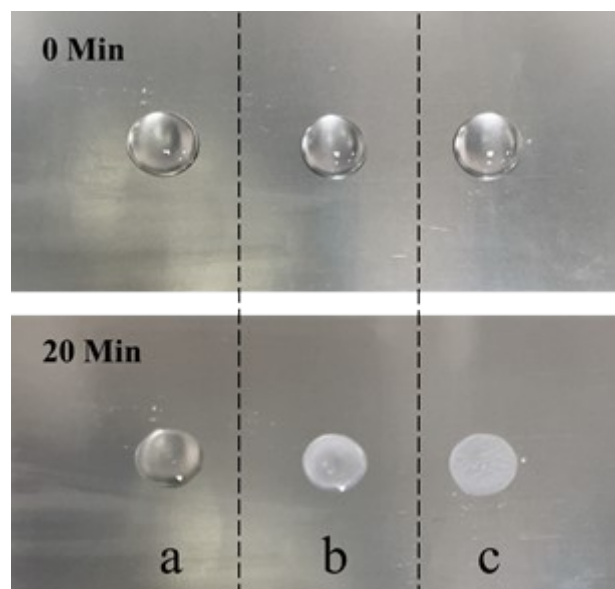

**Fig. S8.** Comparison of volatility among (a) 1 M Suc, (b) 1 M ZnSO<sub>4</sub> with 10 mM Suc, and (c) 1 M ZnSO<sub>4</sub> at room temperature.

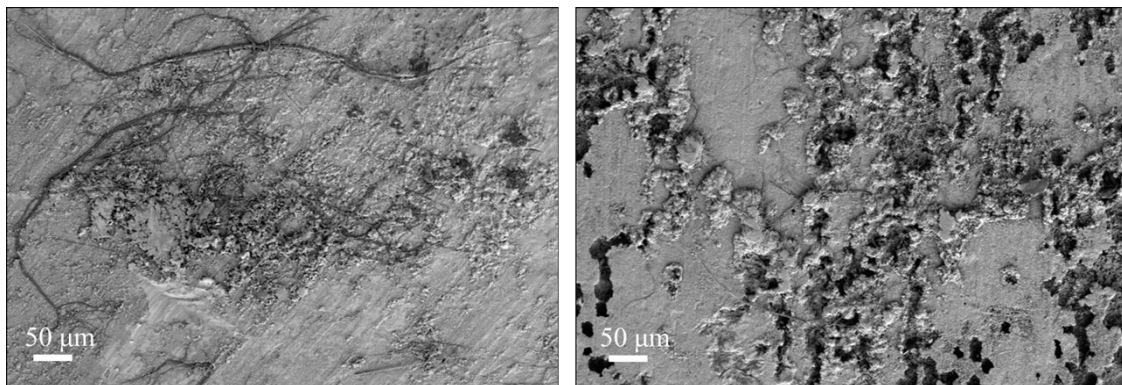

**Fig. S9.** SEM images of Zn electrodes that are cycled out of the cells in ZnSO<sub>4</sub> electrolyte after the 30<sup>th</sup> plating.

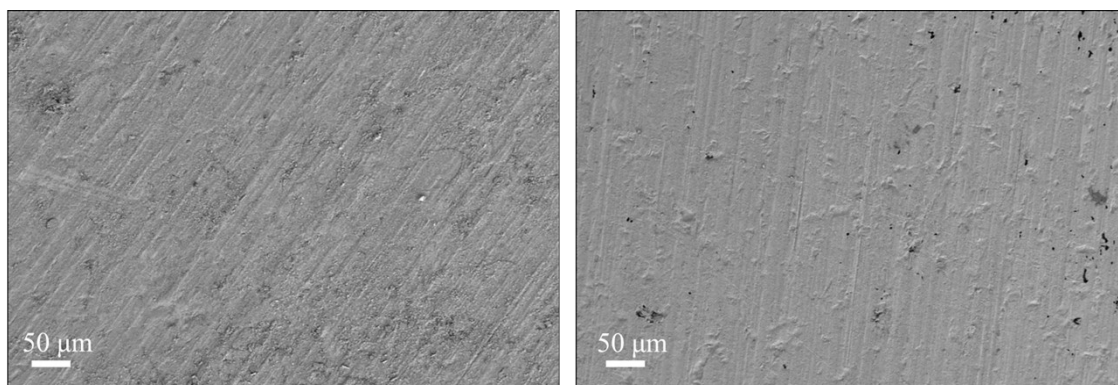

**Fig. S10.** SEM images of Zn electrodes cycled out of the cells in ZnSO<sub>4</sub> electrolyte with Suc after the 30<sup>th</sup> plating.



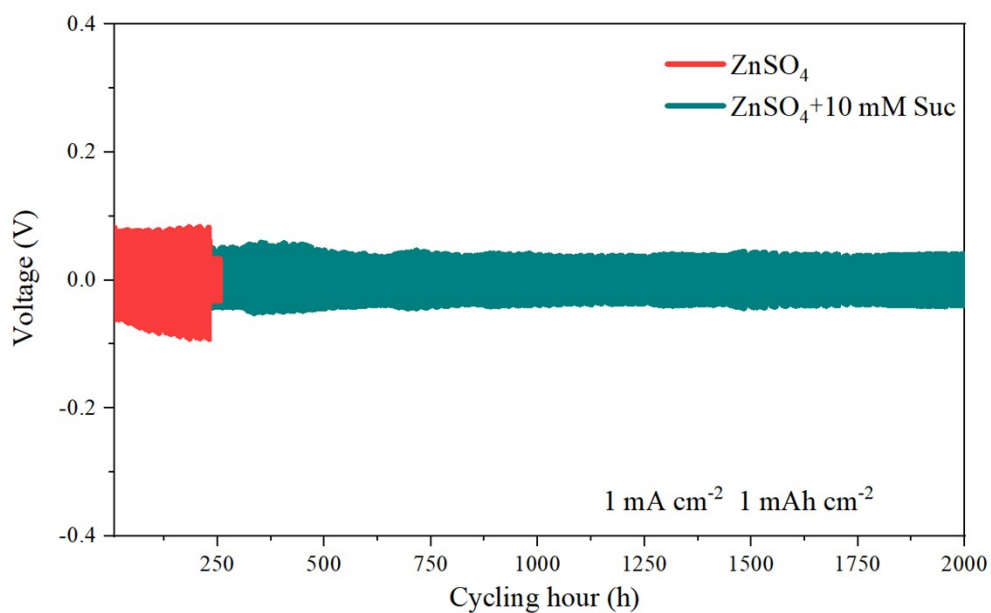

**Fig. S11.** Comparison of long-term galvanostatic charging/discharging of Zn//Zn symmetric cell between 1 M ZnSO<sub>4</sub> and 1 M ZnSO<sub>4</sub> with 10 mM Suc addition under a current density and deposition capacity of 1 mA cm<sup>-2</sup> and 1 mAh cm<sup>-2</sup>, respectively.

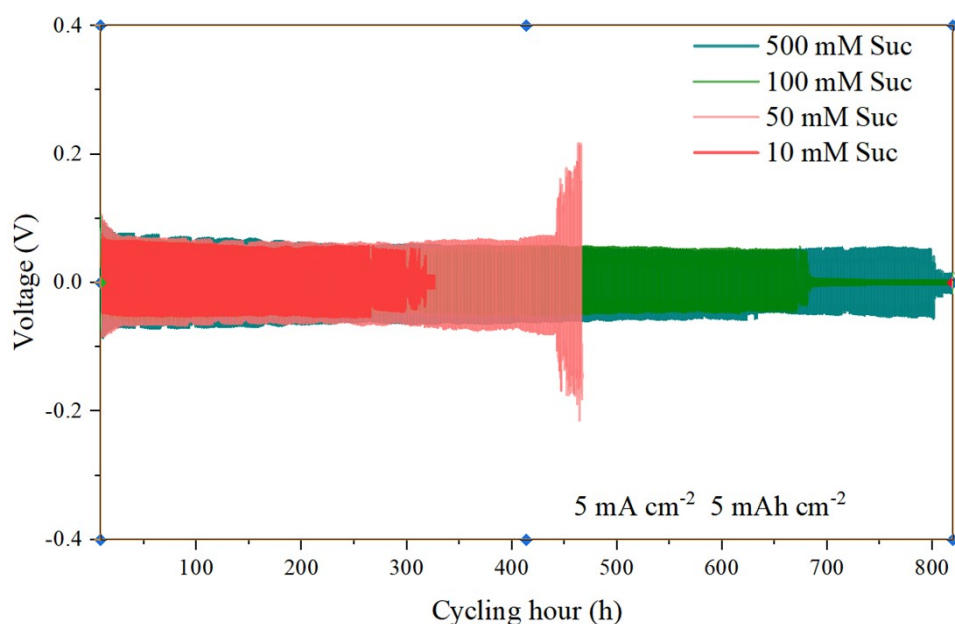

**Fig. S12.** Comparison of long-term galvanostatic charging/discharging of Zn//Zn symmetric cell with different Suc concentration addition under a current density and deposition capacity of 5 mA cm<sup>-2</sup> and 5 mAh cm<sup>-2</sup>, respectively.

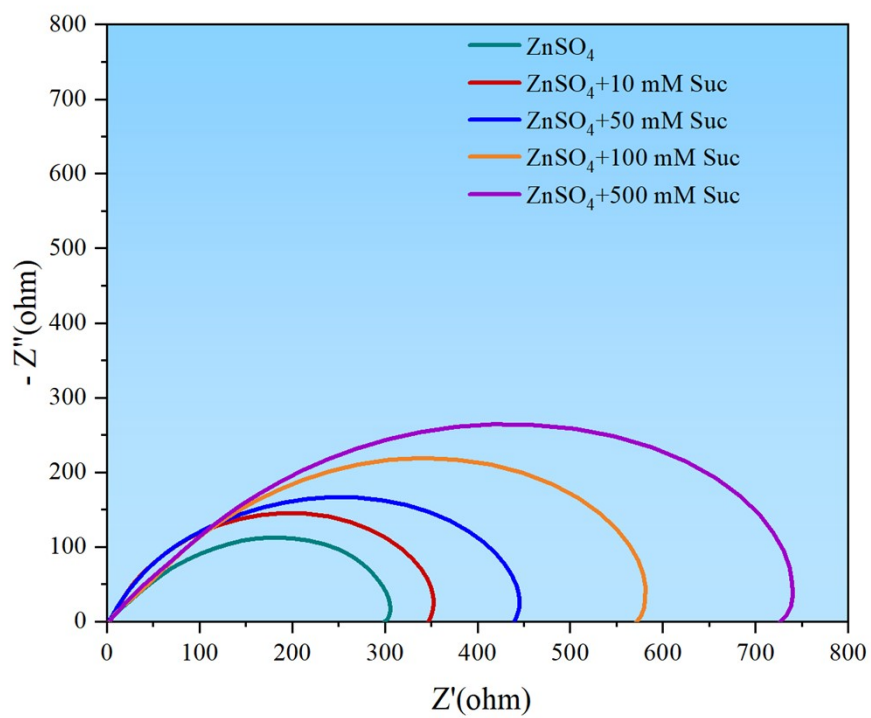

**Fig. S13.** Comparison of the electrochemical impedance of Zn//Zn symmetric cell in  $ZnSO_4$  and  $ZnSO_4$  with 10, 50, 100 and 500 mM electrolytes.

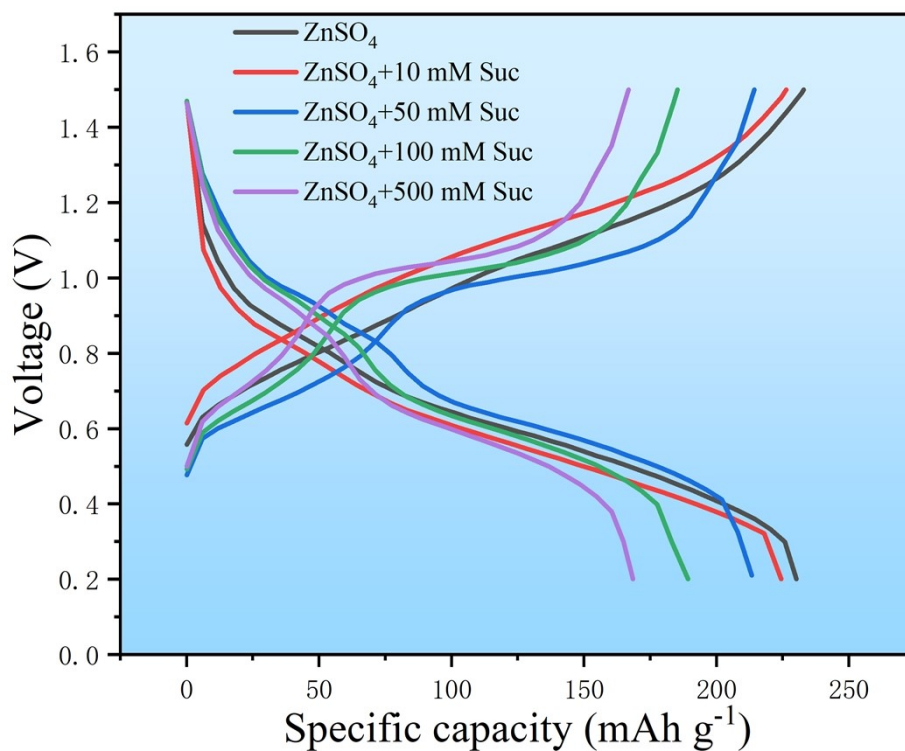

**Fig. S14.** Comparison of the specific capacity of Zn//V<sub>2</sub>O<sub>5</sub> cells at a current density of 1 A g<sup>-1</sup> using ZnSO<sub>4</sub>, and ZnSO<sub>4</sub> with 10, 50, 100 and 500 mM Suc electrolytes.

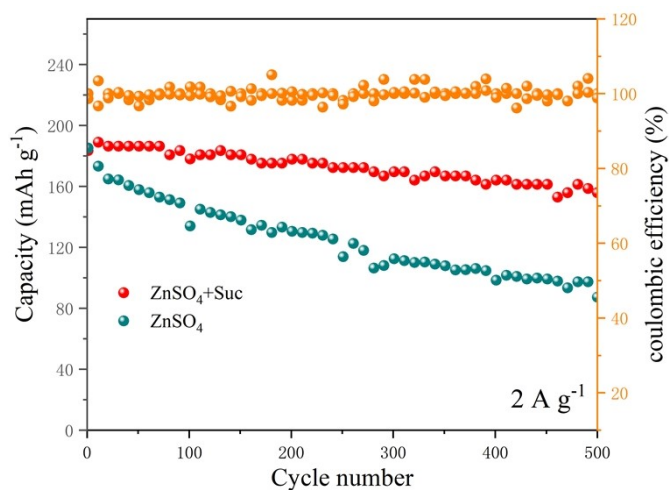

**Fig. S15.** Cycling performance of two Zn//MnO<sub>2</sub> coin cells at a current density of 2 A g<sup>-1</sup>.

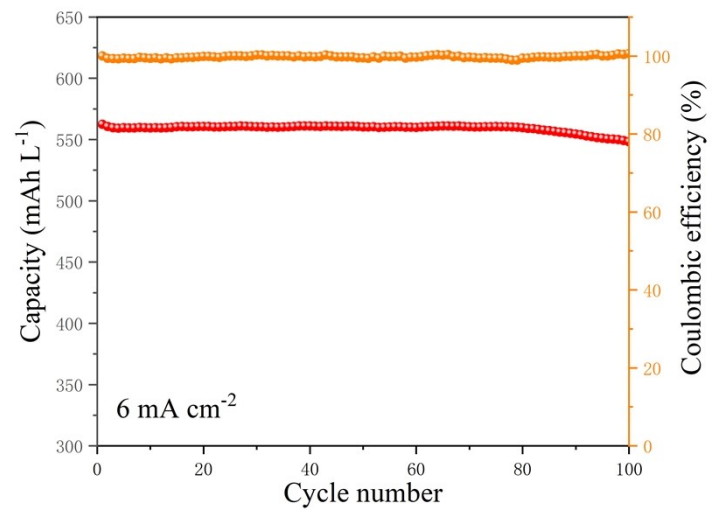

**Fig. S16.** Cycling performance of the Zn//V<sub>2</sub>O<sub>5</sub> pouch battery under the current density of 6 mA cm<sup>-2</sup>.

**Table S1.** Chemical cost estimation of reported electrolyte systems in ZIBs. (The cost is counted based on the price referred to Shanghai Aladdin Biochemical Technology Co., Ltd with all purity above 98%.)

| Electrolyte type                                                  | Chemical                   | Aladdin catalog number (purity) | Mass required ( $\text{g}\cdot\text{L}^{-1}$ electrolyte) | Unit Price ( $\text{\$}\cdot\text{g}^{-1}$ ) | Total price ( $\text{\$}\cdot\text{L}^{-1}$ ) | Reference |
|-------------------------------------------------------------------|----------------------------|---------------------------------|-----------------------------------------------------------|----------------------------------------------|-----------------------------------------------|-----------|
| 3 m $\text{ZnAc}_2$ +<br>3 m $\text{LiAc}$ +<br>30 m $\text{KAc}$ | $\text{ZnAc}_2$            | Z110779<br>(99.99%)             | 550.44                                                    | 0.455                                        | 1271.7                                        | [4]       |
|                                                                   | $\text{LiAc}$              | L118858<br>(99.99%)             | 197.97                                                    | 0.697                                        |                                               |           |
|                                                                   | $\text{KAc}$               | P108329<br>(99%)                | 2944.2                                                    | 0.300                                        |                                               |           |
| 1 M<br>$\text{Zn}(\text{TFSI})_2$ +<br>20 M $\text{LiTFSI}$       | $\text{Zn}(\text{TFSI})_2$ | Z299992<br>(98%)                | 625.65                                                    | 3.962                                        | 16287.37                                      | [5]       |
|                                                                   | $\text{LiTFSI}$            | B398978<br>(99.9%)              | 5741.6                                                    | 2.405                                        |                                               |           |
| 30 m $\text{ZnCl}_2$                                              | $\text{ZnCl}_2$            | Z292534<br>(99.99%)             | 4089                                                      | 6.724                                        | 27494.44                                      | [6]       |
| 4.2 M $\text{ZnSO}_4$<br>+ 0.1 M<br>$\text{MnSO}_4$               | $\text{ZnSO}_4$            | Z111855<br>(99%)                | 1207.71                                                   | 0.036                                        | 47.32                                         | [7]       |
|                                                                   | $\text{MnSO}_4$            | M111711<br>(99.99%)             | 16.91                                                     | 0.227                                        |                                               |           |
| 13 m $\text{ZnCl}_2$ +<br>0.8 m $\text{H}_3\text{PO}_4$           | $\text{ZnCl}_2$            | Z292534<br>(99.99%)             | 1771.9                                                    | 6.724                                        | 12094.34                                      | [8]       |
|                                                                   | $\text{H}_3\text{PO}_4$    | P120547<br>(99%)                | 78.4                                                      | 2.297                                        |                                               |           |
| 67% Maltose<br>+ 2 M $\text{ZnSO}_4$                              | Maltose                    | M104816<br>(98%)                | 670                                                       | 0.102                                        | 75.17                                         | [9]       |
|                                                                   | $\text{ZnSO}_4$            | Z111855<br>(99%)                | 189.78                                                    | 0.036                                        |                                               |           |
| 32 vol% 3 M<br>$\text{ZnSO}_4$ + 68<br>vol% EG                    | Ethylene glycol            | E119700<br>(99.8%)              | 756.84                                                    | 0.163                                        | 133.30                                        | [10]      |
|                                                                   | $\text{ZnSO}_4$            | Z111855<br>(99%)                | 276.06                                                    | 0.036                                        |                                               |           |
| 10 m M<br>Sucrose + 1<br>M $\text{ZnSO}_4$                        | Sucrose                    | S112226<br>(99.9%)              | 3.42                                                      | 0.063                                        | 10.57                                         | This work |
|                                                                   | $\text{ZnSO}_4$            | Z111855<br>(99%)                | 287.56                                                    | 0.036                                        |                                               |           |

**Table S2.** Comparison of high current stability performance of ZIBs from previous reports and our work.

| Cathode                                                                              | Electrolyte                                           | Cycling condition            |              | Capacity retention | Reference |
|--------------------------------------------------------------------------------------|-------------------------------------------------------|------------------------------|--------------|--------------------|-----------|
|                                                                                      |                                                       | Current (A·g <sup>-1</sup> ) | Cycle number |                    |           |
| HfO <sub>2</sub> -coated ZVO                                                         | 1 M ZnSO <sub>4</sub>                                 | 10                           | 1000         | 84%                | [11]      |
| V <sub>2</sub> O <sub>5</sub>                                                        | 1 M Zn(CF <sub>3</sub> SO <sub>3</sub> ) <sub>2</sub> | 5                            | 1000         | 99.3%              | [12]      |
| NaCa <sub>0.6</sub> V <sub>6</sub> O <sub>16</sub> ·3H <sub>2</sub> O                | 3 M Zn(CF <sub>3</sub> SO <sub>3</sub> ) <sub>2</sub> | 2                            | 2000         | 94%                | [13]      |
| VO <sub>2</sub>                                                                      | 1 M ZnSO <sub>4</sub>                                 | 3                            | 945          | 75.5%              | [14]      |
| H <sub>2</sub> V <sub>3</sub> O <sub>8</sub>                                         | 3 M Zn(CF <sub>3</sub> SO <sub>3</sub> ) <sub>2</sub> | 20                           | 2000         | 87%                | [15]      |
| Fe <sub>5</sub> V <sub>15</sub> O <sub>39</sub> (OH) <sub>9</sub> ·9H <sub>2</sub> O | 1 M ZnSO <sub>4</sub>                                 | 5                            | 300          | 80%                | [16]      |
| α-MnO <sub>2</sub>                                                                   | 1 M ZnSO <sub>4</sub>                                 | 2.5                          | 100          | 100%               | [17]      |
| V <sub>2</sub> O <sub>5</sub>                                                        | 3 M ZnSO <sub>4</sub>                                 | 2                            | 400          | 93.4%              | [18]      |
| MnO <sub>2</sub>                                                                     | 10 m M Glucose + 1 M ZnSO <sub>4</sub>                | 3.08                         | 1000         | 80%                | [19]      |
| MnO <sub>2</sub>                                                                     | 2 M ZnSO <sub>4</sub>                                 | 1                            | 900          | 83.1%              | [20]      |
| V <sub>2</sub> O <sub>5</sub>                                                        | 10 m M Sucrose + 1 M ZnSO <sub>4</sub>                | 10 A·g <sup>-1</sup>         | 2000         | 96.2%              | This work |

## References:

- [1] G. Kresse, J. Hafner, *Phys Rev B Condens Matter*. **1993**, *47*, 558 – 561.
- [2] J. P. Perdew, K. Burke, Ernzerhof M, *Phys Rev Lett*. **1996**, *77*, 3865 – 3868.
- [3] S. Grimme, J. Antony, S. Ehrlich, H. Krieg, *J Chem Phys*. **2010**, *132*, 154104.
- [4] J. Han, A. Mariani, A. Varzi and S. Passerini, *J. Power Sources*. **2021**, *485*, 229329.
- [5] F. Wang, O. Borodin, T. Gao, X. Fan, W. Sun, F. Han, A. Faraone, J. Dura, K. Xu and C. Wang, *Nat. Mater*. **2018**, *17*, 543.
- [6] C. Zhang, J. Holoubek, X. Wu, A. Daniyar, L. Zhu, C. Chen, D. P. Leonard, I. A. Rodriguez- Perez, J. X. Jiang, C. Fang and X. Ji, *Chem. Commun*. **2018**, *54*, 14097 – 14099.
- [7] B. Olbasa, F.. Fenta, S. Chiu, M. Tsai, C. Huang, B. Jote, T. Beyene, Y. Liao, C. Wang, W. Su, H. Dai and B. H wang, *ACS Appl. Energy Mater*. **2020**, *3*, 4499 – 4508.
- [8] H. Shi, Y. Song, Z. Qin, C. Li, D. Guo, X. Liu and X. Sun, *Angew. Chem. Int. Ed*. **2019**, *58*, 16057-16061.
- [9] W. Chen, S. Guo, L. Qin, L. Li, X. Cao, J. Zhou, Z. Luo, G. Fang and S. Liang, *Adv. Funct. Mater*. **2022**, 2112609.
- [10] R. Qin, Y. Wang, M. Zhang, Y. Wang, S. Ding , A. Song , H. Yi , L. Yang , Y. Song , Y. Cui , J. Liu , Z. Wang , S. Li, Q. Zhao, F. Pan, *Nano Energy*. **2021**, *80*, 105478.
- [11] J. Guo, J. Ming, Y. Lei, W. Zhang, C. Xia, Y. Cui and H. N. Alshareef, *ACS Energy Lett*. **2019**, *4*, 2776 – 2781.
- [12] N. Zhang, Y. Dong, M. Jia, X. Bian, Y. Wang, M. Qiu, J. Xu, Y. Liu, L. Jiao and F. Cheng, *ACS Energy Lett*. **2018**, *3*, 1366 – 1372.

- [13] K. Zhu, T. Wu, K. Huang, *Adv. Energy Mater.* **2019**, *9*, 1901968.
- [14] Z. Li, S. Ganapathy, Y. Xu, Z. Zhou, M. Sarilar and M. Wagemaker, *Adv. Energy Mater.* **2019**, *9*, 1900237.
- [15] Q. Pang, C. Sun, Y. Yu, K. Zhao, Z. Zhang, P. Voyles, G. Chen, Y. Wei and X. Wang, *Adv. Energy Mater.* **2018**, *8*, 1800144.
- [16] Z. Peng, Q. Wei, S. Tan, P. He, W. Luo, Q. An and L. Mai, *Chem. Commun.* **2018**, *54*, 4041 – 4044.
- [17] C. Xu, B. Li, H. Du and F. Kang, *Angew. Chem. Int. Ed.* **2012**, *51*, 933 – 935.
- [18] J. Zhou, L. Shan, Z. Wu, X. Guo, G. Fanga and S. Liang, *Chem. Commun.* **2018**, *54*, 4457 – 4460.
- [19] P. Sun, L. Ma, W. Zhou, M. Qiu, Z. Wang, D. Chao and W. Mai, *Angew. Chem. Int. Ed.* **2021**, *60*, 18247– 18255.
- [20] W. Guo, Y. Zhang, X. Tong, X. Wang, L. Zhang, X. Xia, J. Tu, *Materials Today Energy.* **2021**, *20*, 100675.
